- oculocardiac and oculo-respiratory reflexes during sevoflurane or halothane anesthesia for strabismus surgery in children. *Anesth Analg* 2000; 90:306–10
17. Khurana AK, Khurana I, Yadav RN, Singh PI, Gombar KK, Ahluwalia BK: An experimental model of oculo-respiratory reflex. *Br J Ophthalmol* 1992; 76:76–8
  18. Panneton WM: The mammalian diving response: An enigmatic reflex to preserve life? *Physiology (Bethesda)* 2013; 28:284–97
  19. Alboni P, Alboni M, Gianfranchi L: Diving bradycardia: A mechanism of defence against hypoxic damage. *J Cardiovasc Med (Hagerstown)* 2011; 12:422–7
  20. McCulloch PF, Faber KM, Panneton WM: Electrical stimulation of the anterior ethmoidal nerve produces the diving response. *Brain Res* 1999; 830:24–31
  21. Kanamaru A, Mutoh T, Nishimura R, Sasaki N, Kuwahara M, Tsubone H: Respiratory and cardiovascular reflexes elicited by nasal instillation of capsaicin to anesthetized, spontaneously breathing dogs. *J Vet Med Sci* 2001; 63:439–43
  22. Berk JL, Lenner KA, McFadden ER Jr: Cold-induced bronchoconstriction: Role of cutaneous reflexes vs. direct airway effects. *J Appl Physiol* (1985) 1987; 63:659–64
  23. Mukhtar MR, Patrick JM: Bronchoconstriction: A component of the 'diving response' in man. *Eur J Appl Physiol Occup Physiol* 1984; 53:155–8

## ANESTHESIOLOGY REFLECTIONS FROM THE WOOD LIBRARY-MUSEUM

### Byzantine Ivory Scene of the Biblical Sleep of Adam and the Creation of Eve

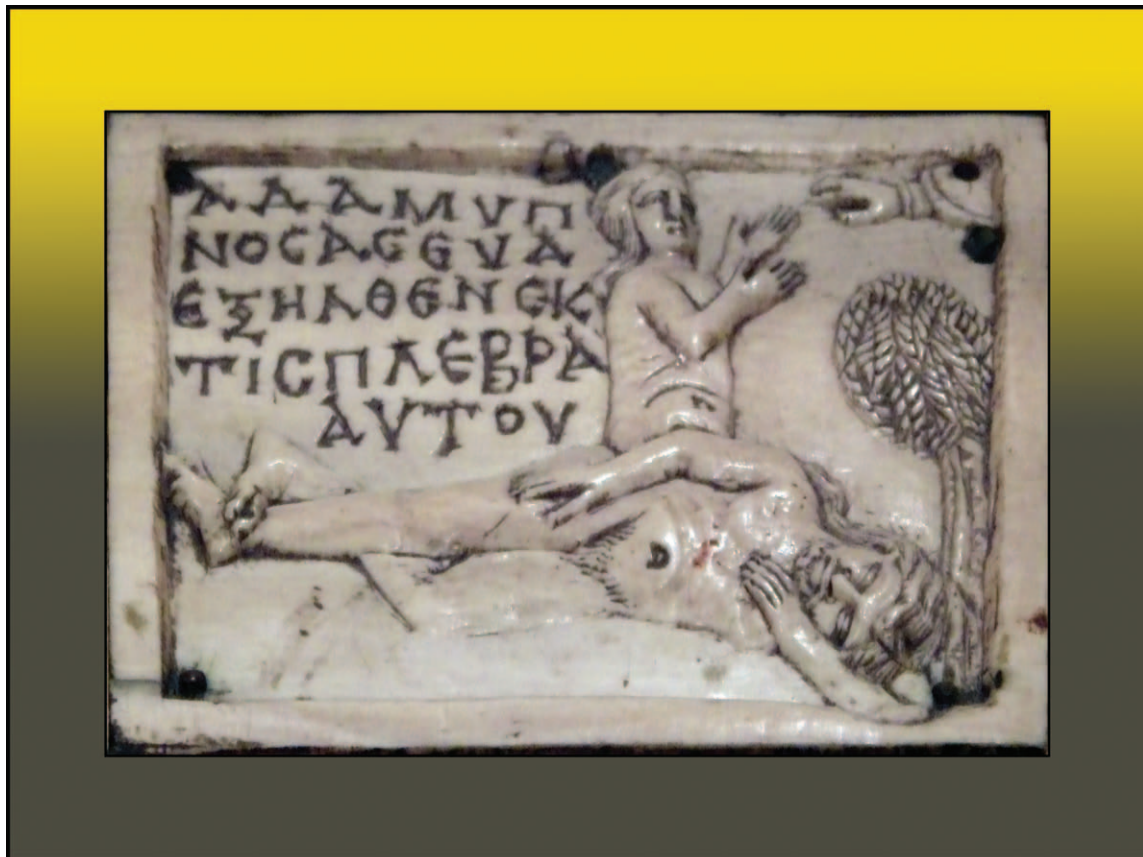

In Cleveland, Ohio, just a few miles from where Charles K. Teter, D.D.S., founded the United States' second major anesthesia machine manufacturing company, stands the celebrated Cleveland Museum of Art. Housed in that museum is a wood-and-ivory box from Byzantium (later Constantinople, then Istanbul) dating back to ca.1050 CE. One of the carved-ivory scenes (*above*) on the lid of the box depicts the biblical account from the book of *Genesis* of the creation of Eve after a "deep sleep" falls upon Adam. The Byzantine lettering can be transliterated to ADAM HYPNOSAS EVA EXELTHEN EK TIS PLEURA AUTOU and can be translated to "Here Eve came from out of a flank of sleeping Adam." Generations of scholars have suggested that the *Genesis* account of Adam's heavy slumber strongly resembles the "modern" state of general anesthesia. (Copyright © the American Society of Anesthesiologists' Wood Library-Museum of Anesthesiology.)

George S. Bause, M.D., M.P.H., *Honorary Curator and Laureate of the History of Anesthesia, Wood Library-Museum of Anesthesiology, Schaumburg, Illinois, and Clinical Associate Professor, Case Western Reserve University, Cleveland, Ohio. UJYC@aol.com.*
